# Supplementary material for: Probing the interaction of spermine and 1-naphthyl acetyl spermine with DNA polynucleotides: a comparative biophysical and thermodynamic investigation
Source: Royal Society of Chemistry journal article supplement (doi:10.1039/c3mb70616h), 2014-01-31
Supplement: c3mb70616h1.pdf [file c3mb70616h1.pdf]

**Electronic Supplementary Information**

**Probing the interaction of spermine and 1-naphthyl acetyl spermine with DNA polynucleotides: A comparative biophysical and thermodynamic investigation**

Ayesha Kabir and Gopinatha Suresh Kumar\*

*Biophysical Chemistry Laboratory, Chemistry Division, CSIR- Indian Institute of Chemical Biology, Kolkata 700 032, India*

*Correspondence to:*

Dr. G. Suresh Kumar

Senior Principal Scientist, Biophysical Chemistry Laboratory

CSIR-Indian Institute of Chemical Biology

4, Raja S. C. Mullick Road, Kolkata 700 032, INDIA

Phone: +91 33 2472 4049, Fax: +91 33 2473 0284 / 5197

e-mail: [gskumar@iicb.res.in](mailto:gskumar@iicb.res.in)/[gsk.iicb@gmail.com](mailto:gsk.iicb@gmail.com)

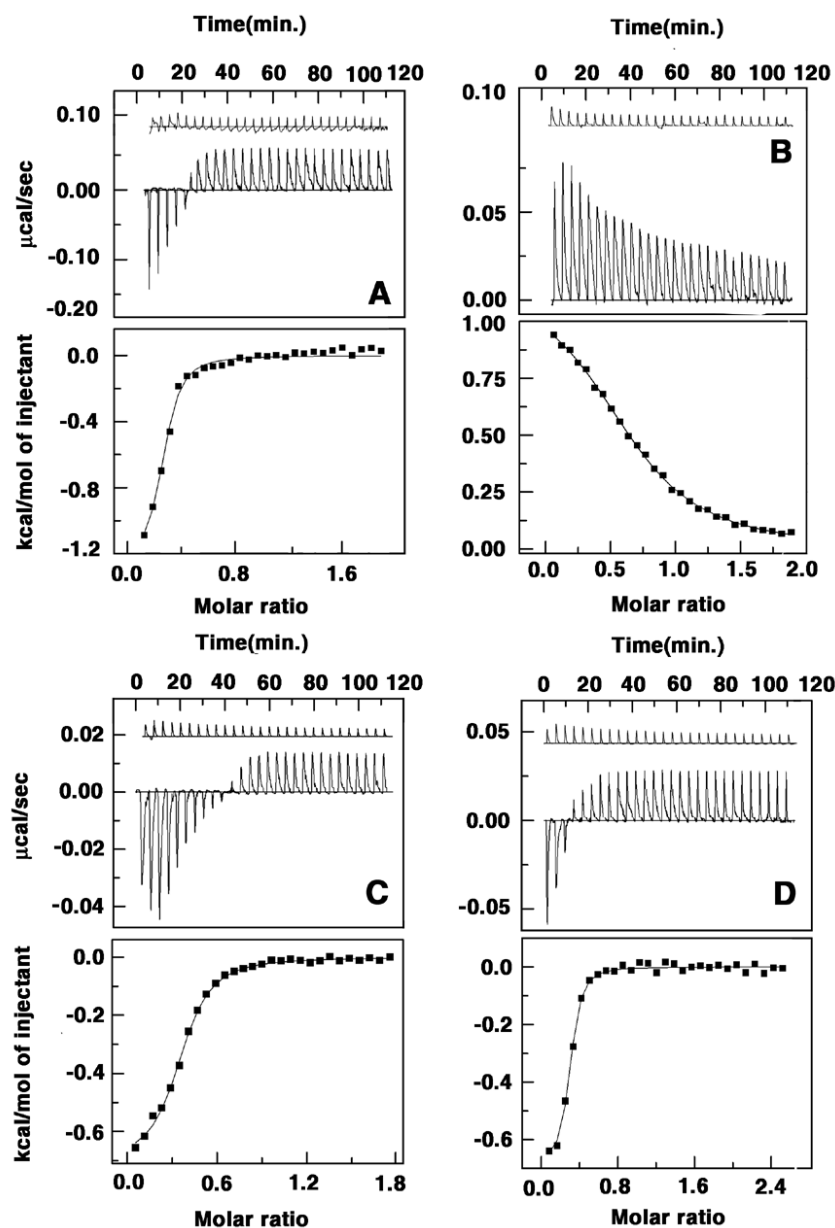

**FIG. S1**

**Fig. S1.** ITC profiles for the titration of SPM with (A) poly(dG).poly(dC) (B) poly(dG-dC).poly(dG-dC) and titration of NASPM with (C) poly(dG).poly(dC) (D) poly(dG-dC).poly(dG-dC). The top panels represent the raw data for the sequential injection of SPM and NASPM into a solution of DNA polynucleotide and the bottom panels show the integrated heat data after correction of heat of dilution against molar ratio of DNA polynucleotide/[polyamine]. The data points were fitted to one site model and the solid line represent the best fit data.

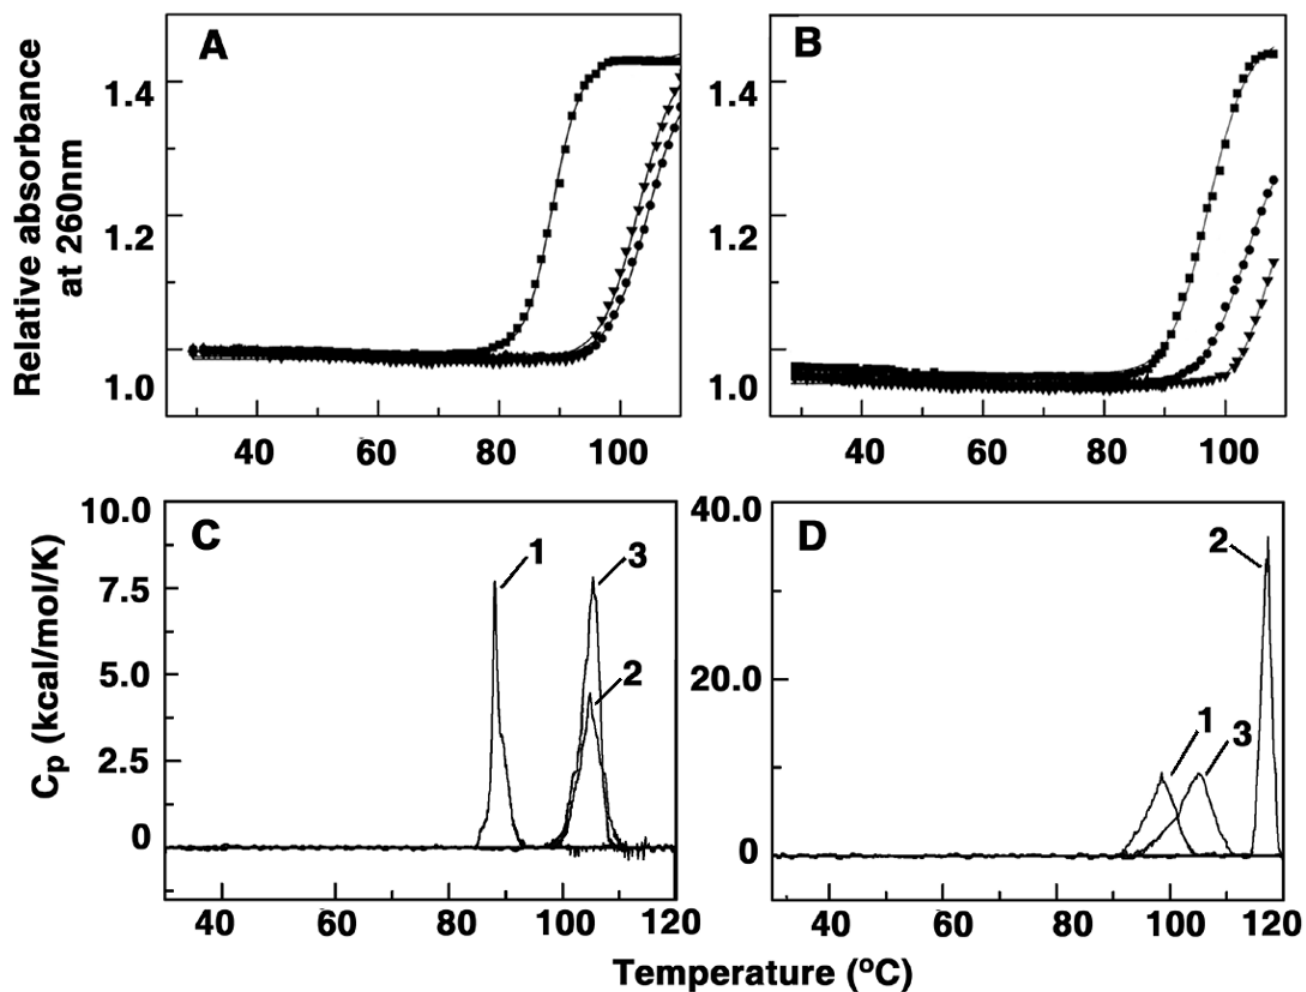

**FIG. S2**

Fig. S2. Optical melting profiles (lower panels) (A) poly(dG).poly(dC) (●), NASPM complex (□), SPM complex (⊗), (B) poly(dG-dC).poly(dG-dC) (●), NASPM complex (□), SPM complex (⊗).. DSC melting profiles (upper panels) of (C) poly(dG).poly(dC) (curve1), NASPM complex (curve 2), SPM complex (curve 3), (D) poly(dG-dC).poly(dG-dC) (curve1), NASPM complex (curve 2), SPM complex (curve 3)..

| <b>Table S1:</b> ITC derived thermodynamic parameters for the binding of SPM and NASPM to poly(dG).poly(dC) and poly(dG-dC).poly(dG-dC). <sup>a</sup>                                                                                                                                                                                                                                                                                                                                                                                                     |                 |                                      |                   |                             |                             |                              |                                |
|-----------------------------------------------------------------------------------------------------------------------------------------------------------------------------------------------------------------------------------------------------------------------------------------------------------------------------------------------------------------------------------------------------------------------------------------------------------------------------------------------------------------------------------------------------------|-----------------|--------------------------------------|-------------------|-----------------------------|-----------------------------|------------------------------|--------------------------------|
| Polyamines                                                                                                                                                                                                                                                                                                                                                                                                                                                                                                                                                | Temperature (K) | $K$ ( $\times 10^5 \text{ M}^{-1}$ ) | N                 | $\Delta G^\circ$ (kcal/mol) | $\Delta H^\circ$ (kcal/mol) | $T\Delta S^\circ$ (kcal/mol) | $\Delta C_p^\circ$ (cal/mol K) |
| Poly(dG).poly(dC)                                                                                                                                                                                                                                                                                                                                                                                                                                                                                                                                         |                 |                                      |                   |                             |                             |                              |                                |
| SPM                                                                                                                                                                                                                                                                                                                                                                                                                                                                                                                                                       | 283.15          | 11.1 $\pm$ 0.17                      | 0.294 $\pm$ 0.003 | -7.816 $\pm$ 0.019          | -0.656 $\pm$ 0.009          | 7.160 $\pm$ 0.012            | -60.6 $\pm$ 0.01               |
|                                                                                                                                                                                                                                                                                                                                                                                                                                                                                                                                                           | 288.15          | 8.33 $\pm$ 0.07                      | 0.278 $\pm$ 0.003 | -7.824 $\pm$ 0.021          | -0.912 $\pm$ 0.011          | 6.912 $\pm$ 0.016            |                                |
|                                                                                                                                                                                                                                                                                                                                                                                                                                                                                                                                                           | 293.15          | 6.63 $\pm$ 0.13                      | 0.252 $\pm$ 0.008 | -7.796 $\pm$ 0.013          | -1.262 $\pm$ 0.006          | 6.534 $\pm$ 0.020            |                                |
| NASPM                                                                                                                                                                                                                                                                                                                                                                                                                                                                                                                                                     | 283.15          | 6.80 $\pm$ 0.07                      | 0.404 $\pm$ 0.004 | -7.561 $\pm$ 0.012          | -0.175 $\pm$ 0.003          | 7.386 $\pm$ 0.011            | -52.9 $\pm$ 0.11               |
|                                                                                                                                                                                                                                                                                                                                                                                                                                                                                                                                                           | 288.15          | 5.23 $\pm$ 0.06                      | 0.372 $\pm$ 0.006 | -7.537 $\pm$ 0.018          | -0.337 $\pm$ 0.007          | 7.200 $\pm$ 0.016            |                                |
|                                                                                                                                                                                                                                                                                                                                                                                                                                                                                                                                                           | 293.15          | 3.93 $\pm$ 0.03                      | 0.357 $\pm$ 0.004 | -7.502 $\pm$ 0.021          | -0.704 $\pm$ 0.011          | 6.798 $\pm$ 0.013            |                                |
| Poly(dG-dC).poly(dG-dC)                                                                                                                                                                                                                                                                                                                                                                                                                                                                                                                                   |                 |                                      |                   |                             |                             |                              |                                |
| SPM                                                                                                                                                                                                                                                                                                                                                                                                                                                                                                                                                       | 283.15          | 1.71 $\pm$ 0.08                      | 0.703 $\pm$ 0.005 | -6.782 $\pm$ 0.011          | 1.708 $\pm$ 0.018           | 8.491 $\pm$ 0.013            | -52.7 $\pm$ 0.03               |
|                                                                                                                                                                                                                                                                                                                                                                                                                                                                                                                                                           | 288.15          | 0.93 $\pm$ 0.01                      | 0.699 $\pm$ 0.009 | -6.546 $\pm$ 0.013          | 1.403 $\pm$ 0.027           | 7.949 $\pm$ 0.020            |                                |
|                                                                                                                                                                                                                                                                                                                                                                                                                                                                                                                                                           | 293.15          | 0.74 $\pm$ 0.01                      | 0.696 $\pm$ 0.007 | -6.525 $\pm$ 0.017          | 1.181 $\pm$ 0.016           | 7.706 $\pm$ 0.013            |                                |
| NASPM                                                                                                                                                                                                                                                                                                                                                                                                                                                                                                                                                     | 283.15          | 13.3 $\pm$ 0.37                      | 0.358 $\pm$ 0.003 | -7.931 $\pm$ 0.015          | -0.092 $\pm$ 0.014          | 7.839 $\pm$ 0.014            | -78.7 $\pm$ 0.01               |
|                                                                                                                                                                                                                                                                                                                                                                                                                                                                                                                                                           | 288.15          | 10.5 $\pm$ 0.10                      | 0.283 $\pm$ 0.001 | -7.984 $\pm$ 0.021          | -0.409 $\pm$ 0.002          | 7.574 $\pm$ 0.021            |                                |
|                                                                                                                                                                                                                                                                                                                                                                                                                                                                                                                                                           | 293.15          | 8.83 $\pm$ 0.20                      | 0.269 $\pm$ 0.005 | -7.969 $\pm$ 0.019          | -0.879 $\pm$ 0.015          | 7.091 $\pm$ 0.026            |                                |
| <sup>a</sup> All the data in this table are derived from ITC experiments conducted in 20 mM [Na <sup>+</sup> ] citrate-phosphate buffer, pH 7.0 and are average of four determinations, $K$ and $\Delta H^\circ$ values were determined from ITC profiles fitting to Origin 7 software as described in the text. The values of $\Delta G^\circ$ and $T\Delta S^\circ$ were determined using the equation $\Delta G^\circ = -RT\ln K$ , and $T\Delta S^\circ = \Delta H^\circ - \Delta G^\circ$ . All the ITC were fit to a model of single binding sites. |                 |                                      |                   |                             |                             |                              |                                |

**Table S2:** ITC derived thermodynamic parameters for the binding of SPM and NASPM to poly(dG).poly(dC) and poly(dG-dC).poly(dG-dC) in CP buffer pH 7 at 20°C at different [Na<sup>+</sup>] concentration.<sup>a</sup>

| Polyamines              | [Na <sup>+</sup> ]<br>mM | <i>K</i><br>(×10 <sup>5</sup> M <sup>-1</sup> ) | N           | $\Delta G^\circ$<br>(kcal/mol) | $\Delta H^\circ$<br>(kcal/mol) | $T\Delta S^\circ$<br>(kcal/mol) | $\Delta G_{pe}^\circ$<br>(kcal/mol) | $\Delta G_t^\circ$<br>(kcal/mol) |
|-------------------------|--------------------------|-------------------------------------------------|-------------|--------------------------------|--------------------------------|---------------------------------|-------------------------------------|----------------------------------|
| Poly(dG).poly(dC)       |                          |                                                 |             |                                |                                |                                 |                                     |                                  |
| SPM                     | 10                       | 15.2±0.13                                       | 0.438±0.003 | -8.341±0.034                   | -1.929±0.017                   | 6.412 ±0.025                    | -3.427±0.025                        | -4.914±0.036                     |
|                         | 20                       | 6.63±0.13                                       | 0.252±0.008 | -7.855±0.054                   | -1.262±0.006                   | 6.593±0.054                     | -2.911±0.040                        | -4.944±0.049                     |
|                         | 30                       | 3.97±0.32                                       | 0.196±0.003 | -7.521±0.023                   | -0.748±0.017                   | 6.773±0.012                     | -2.610±0.055                        | -4.911±0.027                     |
| NASPM                   | 10                       | 6.24±0.55                                       | 0.477±0.004 | -7.820±0.052                   | -0.752±0.008                   | 7.068±0.052                     | -3.778±0.062                        | -4.041±0.044                     |
|                         | 20                       | 3.93±0.03                                       | 0.357±0.004 | -7.549±0.059                   | -0.704±0.011                   | 6.845±0.059                     | -3.209±0.023                        | -4.339±0.035                     |
|                         | 30                       | 1.23±0.20                                       | 0.191±0.160 | -6.868±0.063                   | -0.296±0.030                   | 6.572±0.056                     | -2.876±0.078                        | -3.991±0.010                     |
| Poly(dG-dC).poly(dG-dC) |                          |                                                 |             |                                |                                |                                 |                                     |                                  |
| SPM                     | 10                       | 1.29±0.08                                       | 0.703±0.008 | -6.896±0.046                   | 1.334±0.019                    | 8.229±0.041                     | -2.780±0.058                        | -4.116±0.020                     |
|                         | 20                       | 0.74±0.01                                       | 0.696±0.007 | -6.573±0.057                   | 1.181±0.016                    | 7.754±0.032                     | -2.361±0.021                        | -4.212±0.066                     |
|                         | 30                       | 0.40±0.03                                       | 0.381±0.017 | -6.213±0.056                   | 0.704±0.004                    | 6.917±0.021                     | -2.116±0.048                        | -4.100±0.024                     |
| NASPM                   | 10                       | 15.4±0.16                                       | 0.308±0.002 | -8.349±0.045                   | -1.120±0.013                   | 7.229±0.033                     | -2.617±0.054                        | -5.731±0.022                     |
|                         | 20                       | 8.83±0.20                                       | 0.269±0.005 | -8.021±0.040                   | -0.879±0.015                   | 7.142±0.041                     | -2.223±0.049                        | -5.797±0.039                     |
|                         | 30                       | 5.44±0.01                                       | 0.258±0.005 | -7.739±0.027                   | -0.431±0.011                   | 7.308±0.028                     | -1.993±0.021                        | -5.745±0.021                     |

<sup>a</sup>All data in this table are derived from ITC experiments conducted in citrate-phosphate buffer pH 7.0, and are an average of four determinations. *K* and  $\Delta H^\circ$  values were determined from ITC profiles fitting to Origin 7 software as described in text. The values of  $\Delta G^\circ$  and  $T\Delta S^\circ$  were determined using the equations,  $\Delta G^\circ = -RT\ln K$ , and  $T\Delta S^\circ = \Delta H^\circ - \Delta G^\circ$ . All the ITC were fit to a model of single binding sites.
